# Supplementary material for: Establishment and characterization of two primary breast cancer cell lines from young Indian breast cancer patients: mutation analysis
Source: PubMed Central journal article supplement (PMC4016554; doi:10.1186/1475-2867-14-14), 2014-02-05

(a)

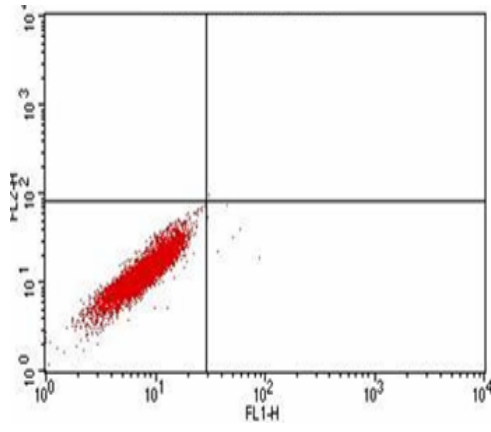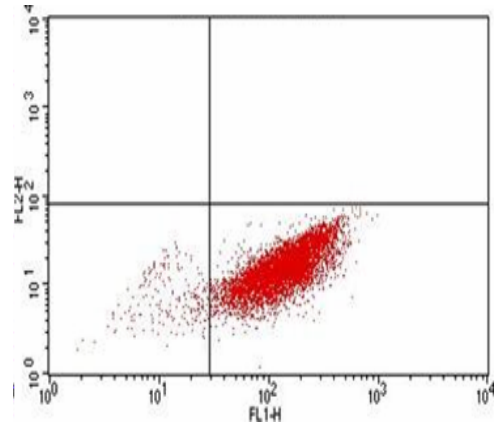

(b)

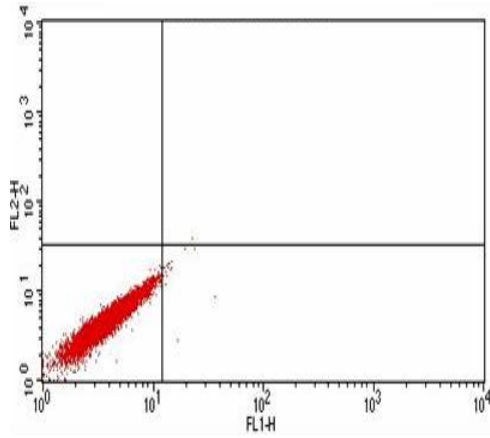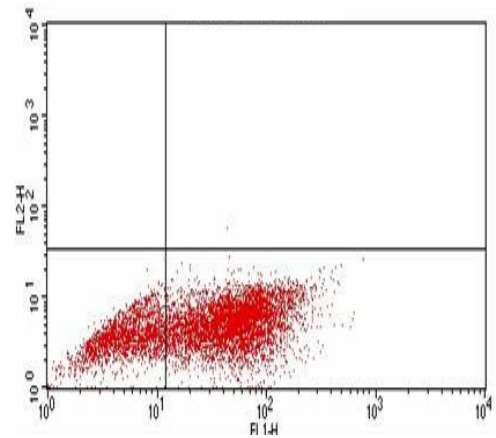

(c)

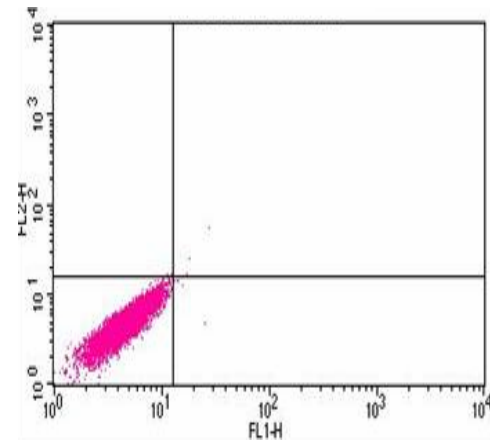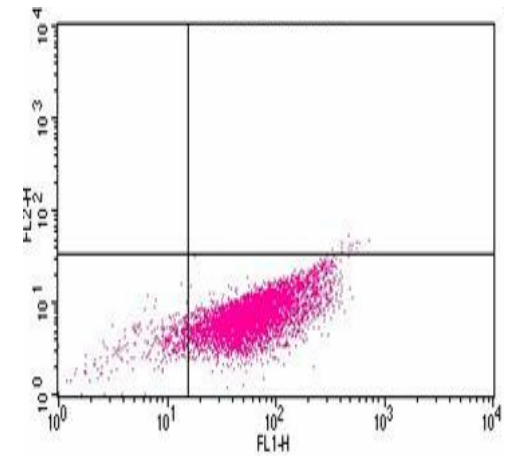

Supplement: 1475-2867-14-14-S1.pdf [file 1475-2867-14-14-S1.pdf]
