# Supplementary material for: Establishment and characterization of two primary breast cancer cell lines from young Indian breast cancer patients: mutation analysis
Source: PubMed Central journal article supplement (PMC4016554; doi:10.1186/1475-2867-14-14), 2014-02-05
Supplement: 1475-2867-14-14-S2.pdf [file 1475-2867-14-14-S2.pdf]

| Marker  | NIPBC-1 | NIPBC-2 |
|---------|---------|---------|
| D5S818  | 11      | 11      |
| Mouse   | -       | -       |
| D13S317 | 12      | 12      |
| D7S820  | 10      | 8, 12   |
| D16S539 | 11      | 9, 12   |
| CSF1PO  | 10, 11  | 10      |
| AMEL    | X, X    | X, X    |
| VWA     | 12      | 12      |
| TPOX    | 8, 13   | 8       |
