# Supplementary material for: Establishment and characterization of two primary breast cancer cell lines from young Indian breast cancer patients: mutation analysis
Source: PubMed Central journal article supplement (PMC4016554; doi:10.1186/1475-2867-14-14), 2014-02-05
Supplement: 1475-2867-14-14-S3.pdf [file 1475-2867-14-14-S3.pdf]

| <b>Gene Name</b> | <b>Exon</b> | <b>DNA Sequence Change</b> | <b>Base variation in NIPBC1</b> | <b>Base variation in NIPBC2</b> | <b>Type of sequence variation</b> |
|------------------|-------------|----------------------------|---------------------------------|---------------------------------|-----------------------------------|
| BRCA1            | Exon11      | g. 2201 C>T                | Yes                             | Yes                             | Polymorphism                      |
| BRCA1            | Exon11      | g. 2731 C>T                | No                              | Yes                             | Polymorphism                      |
| BRCA1            | Exon11      | g. 3232A>G                 | Yes                             | Yes                             | Polymorphism                      |
| BRCA1            | Exon11      | g. 3667 G>A                | Yes                             | Yes                             | Polymorphism                      |
| BRCA2            | Exon11      | g. 3199 A>G                | Yes                             | Yes                             | Polymorphism                      |
| BRCA2            | Exon14      | g. 7470 A>G                | Yes                             | Yes                             | Polymorphism                      |

BRCA1GenBank U14680.1

BRCA2 GenBank NM\_000059.1
