# Supplementary material for: Establishment and characterization of two primary breast cancer cell lines from young Indian breast cancer patients: mutation analysis
Source: PubMed Central journal article supplement (PMC4016554; doi:10.1186/1475-2867-14-14), 2014-02-05
Supplement: 1475-2867-14-14-S4.pdf [file 1475-2867-14-14-S4.pdf]

| Name of the Exon | Primer sequence                             | Product size |
|------------------|---------------------------------------------|--------------|
| Exon 2-3         | tctcatgctggatccccactagtcagaggaccaggtcctc    | 344 bp       |
| Exon 4           | tgctcttttcacccatctacatacggccaggcattgaagt    | 353 bp       |
| Exon 5-6         | tgttcaactgtgcctgactttaaccctcctcccagaga      | 467 bp       |
| Exon 7           | ctgcccacaggtctcccaa<br>aggggtcagaggcaagcaga | 196 bp       |
| Exon 8           | gacaagggtggttgggagta<br>taactgcacccttggctcc | 287 bp       |
| Exon 8-9         | ttgggagtagatggagcctagtgttagactggaaacttt     | 445 bp       |
| Exon 10          | caattgtaactgaaccatcggatgagaatggaatcctat     | 260 bp       |
| Exon 11          | agaccctctcactcatgtgatgacgcacacctattgcaag    | 245 bp       |
